# Supplementary material for: IQGAP3 activates Hedgehog signaling to confer stemness and metastasis via up-regulating GLI1 in lung cancer
Source: PubMed Central journal article supplement — Sci Rep. 2024 Dec 28;14:31327. doi: 10.1038/s41598-024-82793-x (PMC11682282; doi:10.1038/s41598-024-82793-x), 2024-12-28
Supplement: 41598_2024_82793_MOESM1_ESM.pdf [file 41598_2024_82793_MOESM1_ESM.pdf]

| Gene   | Sequence (5'-3')             |
|--------|------------------------------|
| SHH    | F: CCAATTACAACCCCGACATC      |
|        | R: GCATTTAACTTGTCTTTGCACCT   |
| POU5F1 | F: GTGGAGGAAGCTGACAACAA      |
|        | R: AGTGGGTTGTTTGCCTTTGG      |
| NANOG  | F: GGATATTAGCTCCAGCGGTGT     |
|        | R: GACAGTCTCCGTGTGAGGCAT     |
| VIM    | F: CCTGTGATTTGTGGGCCTG       |
|        | R: ACCGCCGAACATCCTACGA       |
| CDH2   | F: GTCAGCAGAAGTTGAAGAAATAGTG |
|        | R: GCAAGTTGATTGGAGGGATG      |
| CDH1   | F: GCCATCGCTTACACCATCCTCAG   |
|        | R: CTCTCTCGGTCCAGCCCAGTG     |
| GAPDH  | F: GAACGGGAAGCTCACTGG        |
|        | R: GCCTGCTTCACCACCTTCT       |
| GLI1   | F: GCGATCTGTGATGGATGAGATTCCC |
|        | R: TGCCTTGTACCCTCCTCCCGAA    |
| IQGAP3 | F: ATGAGCAGAGGCGGCAGAAT      |
|        | R: GAACCACGGAGGGTGCAAAA      |

**Table S1.** The list of primer sequences.

|                          | Univariate analysis<br>HR (95% CI) | P value          | Multivariate analysis<br>HR (95% CI) | P value          |
|--------------------------|------------------------------------|------------------|--------------------------------------|------------------|
| <b>TCGA-LUAD (n=486)</b> |                                    |                  |                                      |                  |
| age                      | 1.007(0.992-1.022)                 | 0.387            |                                      |                  |
| gender                   | 1.081(0.805-1.452)                 | 0.605            |                                      |                  |
| pathologic_N             | <b>1.633(1.378-1.935)</b>          | <b>&lt;0.001</b> | 1.118(0.881-1.420)                   | 0.358            |
| pathologic_T             | <b>1.461(1.218-1.753)</b>          | <b>&lt;0.001</b> | 1.131(0.928-1.378)                   | 0.222            |
| tumor_stage              | <b>1.609(1.395-1.855)</b>          | <b>&lt;0.001</b> | <b>1.471(1.182-1.831)</b>            | <b>&lt;0.001</b> |
| IQGAP3                   | <b>1.194(1.029-1.385)</b>          | <b>0.020</b>     | <b>1.224(1.040-1.442)</b>            | <b>0.015</b>     |

**Table S2.** Multivariate analyses showed that IQGAP3 is both a risk factor for lung cancer and an independent prognostic factor.

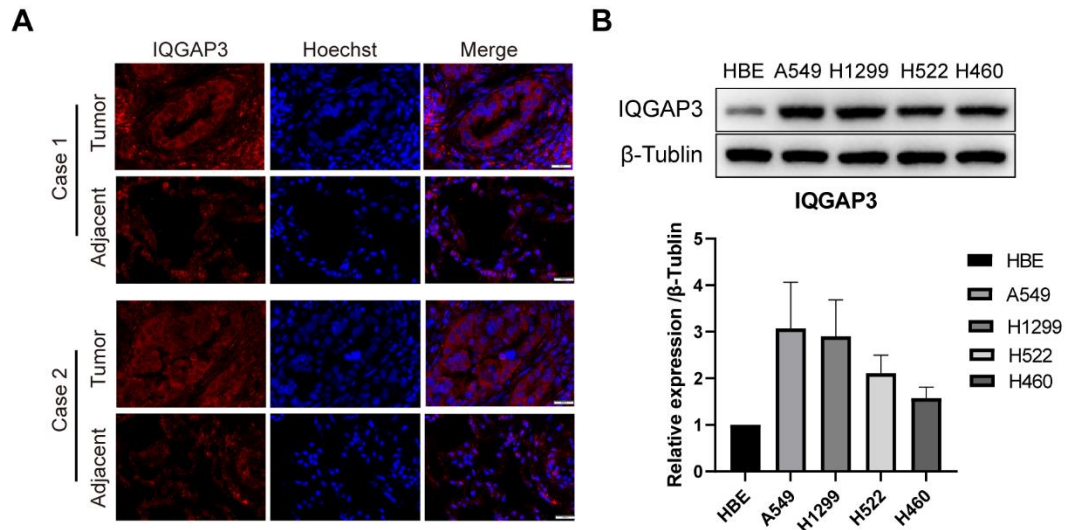

**Supp Fig 1. IQGAP3 is up-regulated in lung cancer tissues as well as in lung cancer cell lines. A** Representative immunofluorescence staining images depicting IQGAP3 expression in matched lung cancer and para-cancer tissues. Scale bar = 100  $\mu$ m. **B** Increased protein levels of IQGAP3 in lung cancer cell lines, particularly in A549 and H1299 cells, compared to normal lung epithelial HBE cells. original blots/gels are presented in Supplementary Figure 3.

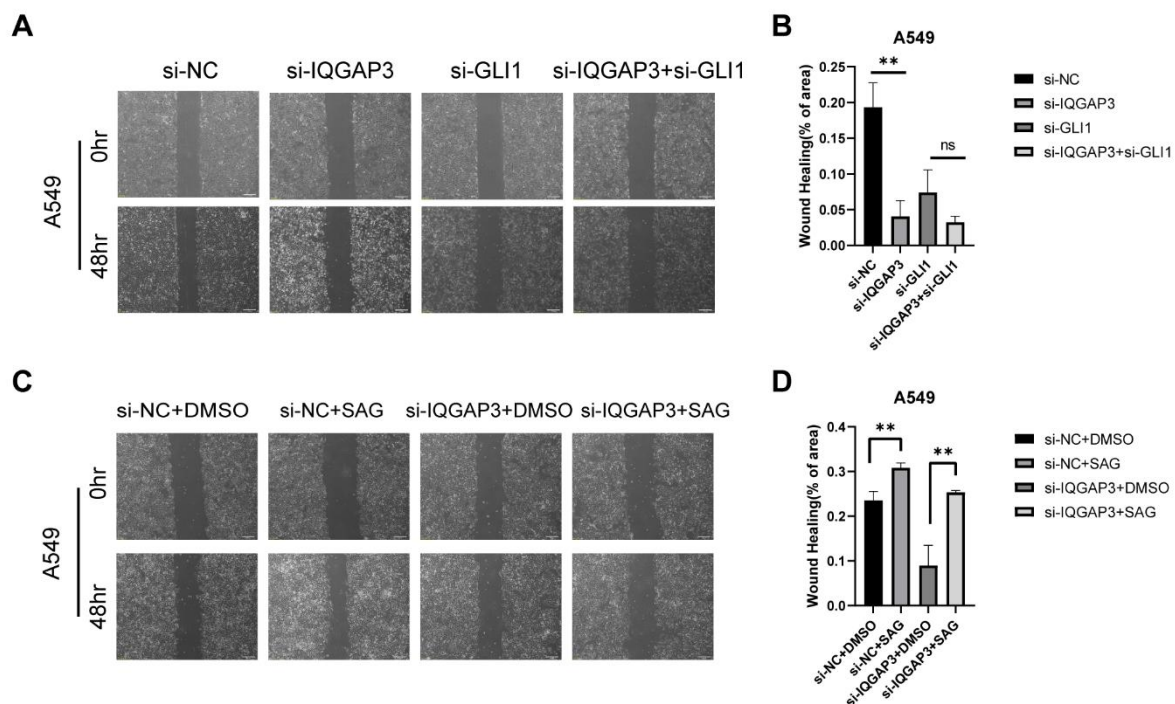

**Supp Fig 2. Activation of the Hedgehog pathway restores IQGAP3 knockdown-induced inhibition of lung cancer migration. A** Representative images and quantified data from wound healing assays conducted in A549 cells after down-regulating IQGAP3 and GLI1. **B** The recovery of

migration ability assessed via wound healing assays in A549 cells after treatment with IQGAP3 siRNA and SAG.

**Fig 3A**

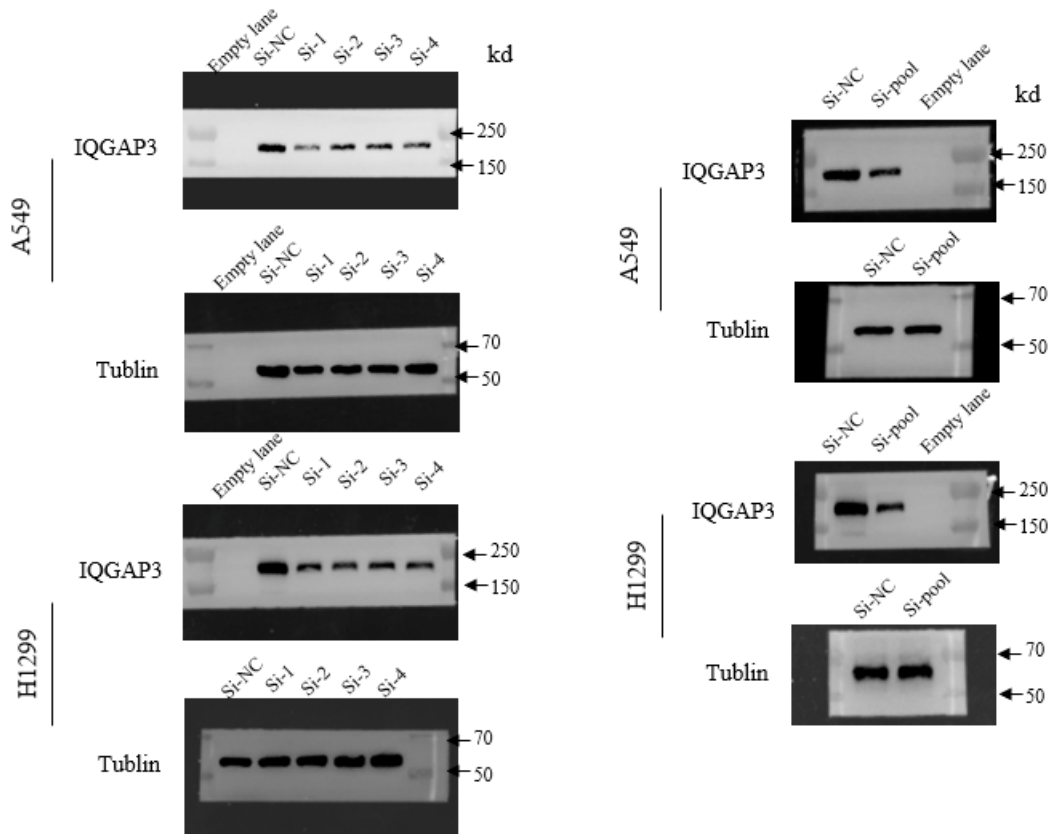

**Fig 4D**

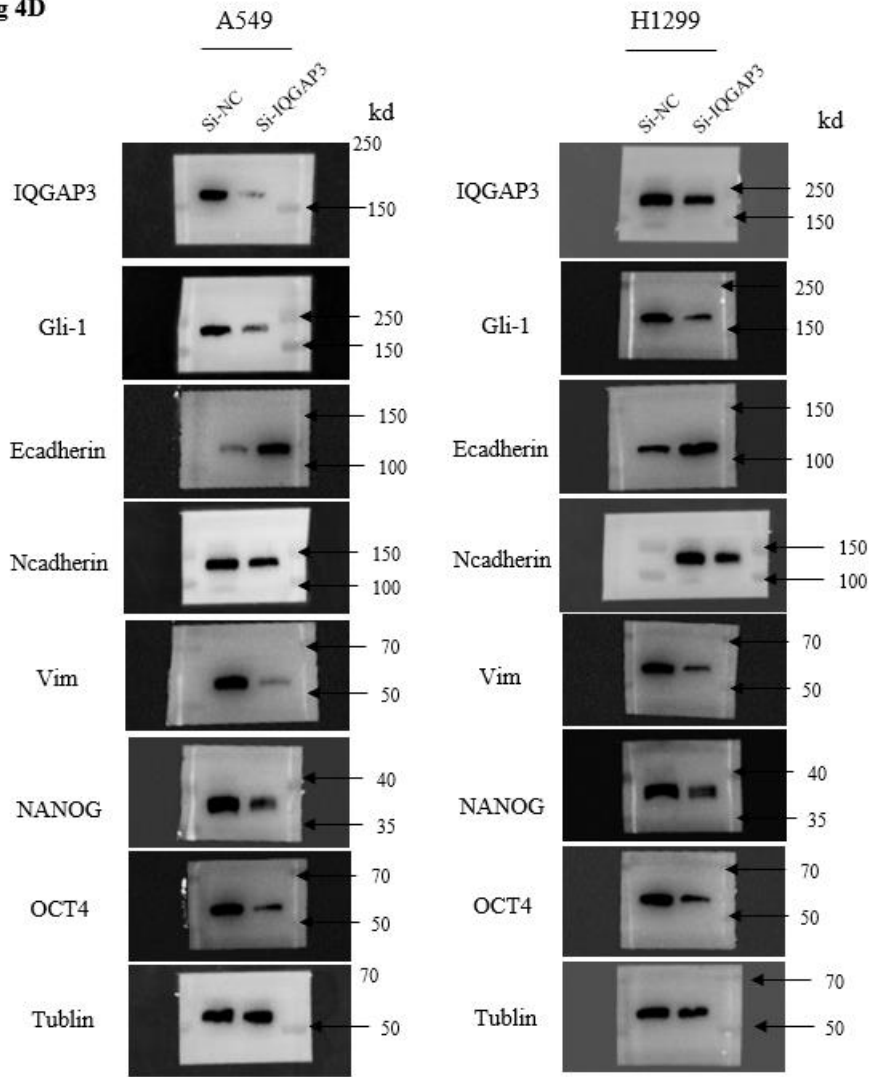

**Fig 4F**

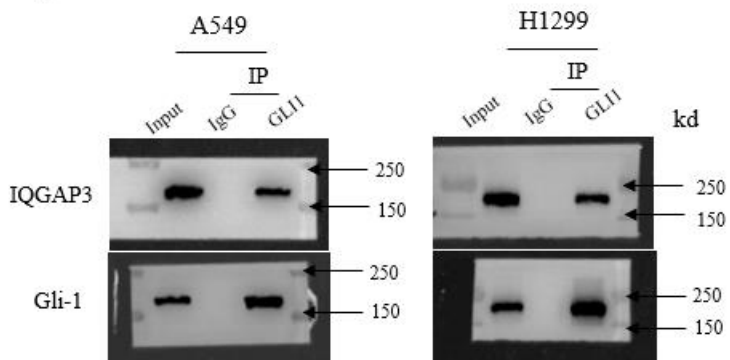

Supp Fig1 B

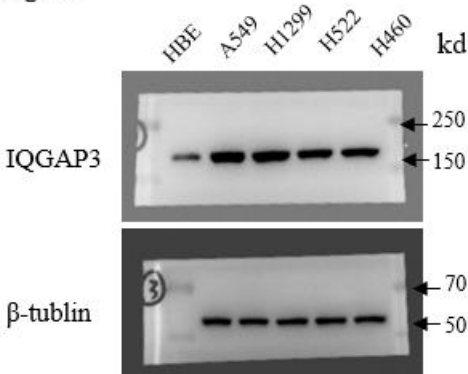

Supp Fig3. The whole Western blot.
